# Supplementary material
Source: publisher site journal article supplement (https://www.dovepress.com/get_supplementary_file.php?f=367012.docx)
Supplement: Supplementary file 1 [file get_supplementary_file.php]

**Supplement material**

Supplement Table 1. HRs and 95%CI of risks of adverse in-hospital outcomes associated with FBG levels.

| Valid | Rate of adverse in-hospital outcomes | HR (95% CI) | | | |
| --- | --- | --- | --- | --- | --- |
| Model 1 | Model 2 | Model 3 | Model 4 |
| **Continuous Variable** | | | | | |
| FBG level | 118(4.8%) | 1.08(1.03-1.13) | 1.06(1.01-1.12) | 1.11(1.04-1.18) | 1.10 (1.04-1.17) |
|  | | | | | |
| **Categorical variable** | | | | | |
| **Binary variable** | | | | | |
| Normal FBG (<7.00 mmol/L) | 78(3.7%) | 1 | 1 | 1 | 1 |
| Hyperglycemia (≥7.00 mmol/L) | 40(11.2%) | 1.97(1.34-2.91) | 1.87 (1.27-2.75) | 2.42 (1.57-3.74) | 2.29 (1.45-3.63) |

Model 1 no adjustment for any covariates.

Model 2 adjusted for age, gender.

Model 3 additionally adjusted for history of hypertension, diabetes, respiratory and cardiovascular and cerebrovascular disease on the basis of Model 2.

Model 4 additionally adjusted for disease type of admission, white blood cell count, hemoglobin, hs-CRP, creatinine, albumin and AST on the basis of Model 3.

Abbreviation: AST, aspartate aminotransferase; CI, confidence interval; FBG, fasting blood glucose; HR, hazard ratio; hs-CRP, high-sensitivity C-reactive protein.

Supplement Table 2. HRs and 95%CI of risk of adverse in-hospital outcomes associated with D-dimer levels in patients of different age groups.

| Valid | Rate of adverse in-hospital outcomes | HR (95% CI) | | | |
| --- | --- | --- | --- | --- | --- |
| Model 1 | Model 2 | Model 3 | Model 4 |
| D-dimer as binary variable | | | | | |
| **<65yrs** |  |  |  |  |  |
| Normal level (<0.50mg/L) | 11(1.1%) | 1 | 1 | 1 | 1 |
| High level (≥0.50mg/L) | 32(6.8%) | 3.61(1.78-7.29) | 3.63(1.80-7.34) | 3.31(1.62-6.74) | 1.86(0.82-4.21) |
| **≥65yrs** |  |  |  |  |  |
| Normal level (<0.50mg/L) | 3(0.9%) | 1 | 1 | 1 | 1 |
| High level (≥0.50mg/L) | 72(11.5%) | 7.25(2.27-23.12) | 7.26(2.27-23.12) | 6.86(2.14-21.94) | 3.89(1.15-13.14) |
|  |  |  |  |  |  |
| FBG as binary variable | | | | | |
| **<65yrs** |  |  |  |  |  |
| Normal level (<7.00 mmol/L) | 28(2.1%) | 1 | 1 | 1 | 1 |
| High level (≥7.00 mmol/L) | 15(8.6%) | 2.35(1.22-4.50) | 2.35(1.23-4.50) | 2.07(0.97-4.39) | 2.10(0.82-5.33) |
| **≥65yrs** |  |  |  |  |  |
| Normal level (<7.00 mmol/L) | 50(6.5%) | 1 | 1 | 1 | 1 |
| High level (≥7.00 mmol/L) | 25(13.7%) | 1.84(1.14-2.98) | 1.87(1.15-3.04) | 2.82(1.59-4.99) | 2.54(1.44-4.47) |

Model 1 no adjustment for any covariates.

Model 2 adjusted for gender.

Model 3 additionally adjusted for history of hypertension, diabetes, respiratory and cardiovascular and cerebrovascular disease on the basis of Model 2.

Model 4 additionally adjusted for disease type of admission, white blood cell count, hemoglobin, hs-CRP, creatinine, albumin and AST on the basis of Model 3.

Abbreviation: AST, aspartate aminotransferase; CI, confidence interval; FBG, fasting blood glucose; HR, hazard ratio; hs-CRP, high-sensitivity C-reactive protein.

Supplement Table 3. HRs and 95%CI of risks of adverse in-hospital outcomes associated with combined groups of D-dimer and FBG levels in patients of different age groups.

|  | Rate of adverse in-hospital outcomes | HR (95% CI) | *P*value |
| --- | --- | --- | --- |
| **<65yrs** |  |  |  |
| D-Dimer <0.50 mg/L and FBG<7.00 mmol/L | 10(1.0%) | 1 |  |
| D-Dimer ≥0.50 mg/L and FBG <7.00 mmol/L | 18(4.6%) | 1.53 (0.63-3.70) | 0.349 |
| D-Dimer <0.50 mg/L and FBG≥7.00 mmol/L | 1(1.1%) | 0.84 (0.10-7.15) | 0.875 |
| D-Dimer ≥0.50 mg/L and FBG≥7.00 mmol/L | 14(16.3%) | 4.04 (1.22-13.41) | 0.023 |
| **≥65yrs** |  |  |  |
| D-Dimer <0.50 mg/L and FBG<7.00 mmol/L | 2(0.8%) | 1 |  |
| D-Dimer ≥0.50 mg/L and FBG <7.00 mmol/L | 48(9.5%) | 3.91 (0.90-17.01) | 0.069 |
| D-Dimer <0.50 mg/L and FBG≥7.00 mmol/L | 1(1.7%) | 2.33 (0.21-26.06) | 0.493 |
| D-Dimer ≥0.50 mg/L and FBG≥7.00 mmol/L | 24(19.7%) | 10.36 (2.25-47.76) | 0.003 |

The adjusted variables included gender, disease type of admission, history of hypertension, diabetes, respiratory and cardiovascular and cerebrovascular disease, white blood cell count, hemoglobin, hs-CRP, creatinine, albumin and AST.

Abbreviation: AST, aspartate aminotransferase; CI, confidence interval; FBG, fasting blood glucose; HR, hazard ratio; hs-CRP, high-sensitivity C-reactive protein.

Supplement Table 4. HRs and 95%CI of risks of adverse in-hospital outcomes associated with combined groups of D-dimer and FBG levels after excluding patients with diabetes.

|  | Rate of adverse in-hospital outcomes | HR (95% CI) | *P*value |
| --- | --- | --- | --- |
| D-Dimer <0.50 mg/L and FBG<7.00 mmol/L | 12(1.0%) | 1 |  |
| D-Dimer ≥0.50 mg/L and FBG <7.00 mmol/L | 66(7.4%) | 2.00 (1.00-4.00) | 0.051 |
| D-Dimer <0.50 mg/L and FBG≥7.00 mmol/L | 2(1.3%) | 0.99 (0.13-7.76) | 0.994 |
| D-Dimer ≥0.50 mg/L and FBG≥7.00 mmol/L | 38(18.3%) | 7.02 (3.05-16.12) | <0.001 |

The adjusted variables included age, gender, disease type of admission, history of hypertension, respiratory and cardiovascular and cerebrovascular disease, white blood cell count, hemoglobin, hs-CRP, creatinine, albumin and AST.

Abbreviation: AST, aspartate aminotransferase; CI, confidence interval; FBG, fasting blood glucose; HR, hazard ratio; Hs-CRP, high-sensitivity C-reactive protein.
